# Supplementary material for: Enhancing the antitumor effect of methotrexate in intro and in vivo by a novel targeted single-walled carbon nanohorn-based drug delivery system
Source: Royal Society of Chemistry journal article supplement (doi:10.1039/c6ra06667d), 2016-01-01
Supplement: c6ra06667d1.pdf [file c6ra06667d1.pdf]

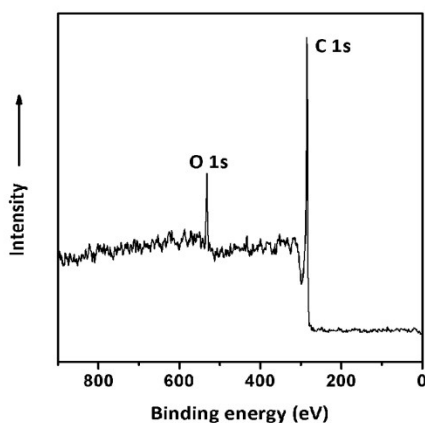

**Figure S1**

**Figure S1. XPS spectra of oxSWNHs**

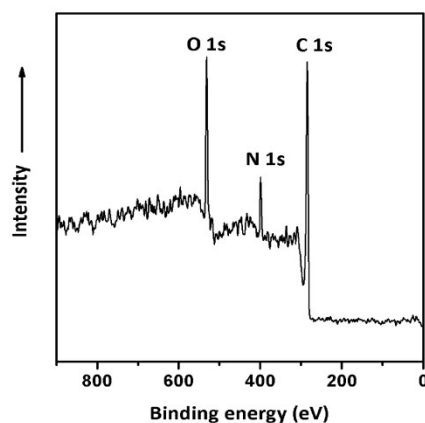

**Figure S2**

**Figure S2. XPS spectra of MTX@oxSWNHs-PEG-Tf**

In Figure S1, peaks corresponding to O 1s and C 1s were observed in spectrum. The mole ratio of C:O was about 93:7. The XPS spectrum of MTX@oxSWNHs-PEG-Tf (S- Figure S2) revealed a new peak at 399 eV for N 1s and mole ratio of C:O:N about 73:9:18. These results clearly showed that MTX and PEG-Tf attached to the surface of the oxSWNHs.
